# Supplementary material for: Estrogen receptor activation remodels TEAD1 gene expression to alleviate hepatic steatosis
Source: PubMed Central journal article supplement (PMC10987545; doi:10.1038/s44320-024-00024-x), 2024-03-08
Supplement: 44320_2024_24_MOESM1_ESM.pdf [file 44320_2024_24_MOESM1_ESM.pdf]

# Appendix

**Estrogen receptor activation remodels TEAD1 gene expression to alleviate hepatic steatosis**

**Sommerauer, Gallardo-Dodd, Savva, Hases, Birgersson, Indukuri, Shen, Carravilla, Geng, Søndergaard, Ferrer-Aumatell, Mercier, Sezgin, Korach-André, Petersson, Hagström, Lauschke, Archer, Williams, Kutter**

## Table of Contents

|                                |          |
|--------------------------------|----------|
| <b>Appendix Figure S1.....</b> | <b>1</b> |
| <b>Appendix Figure S2.....</b> | <b>2</b> |
| <b>Appendix Figure S3.....</b> | <b>3</b> |

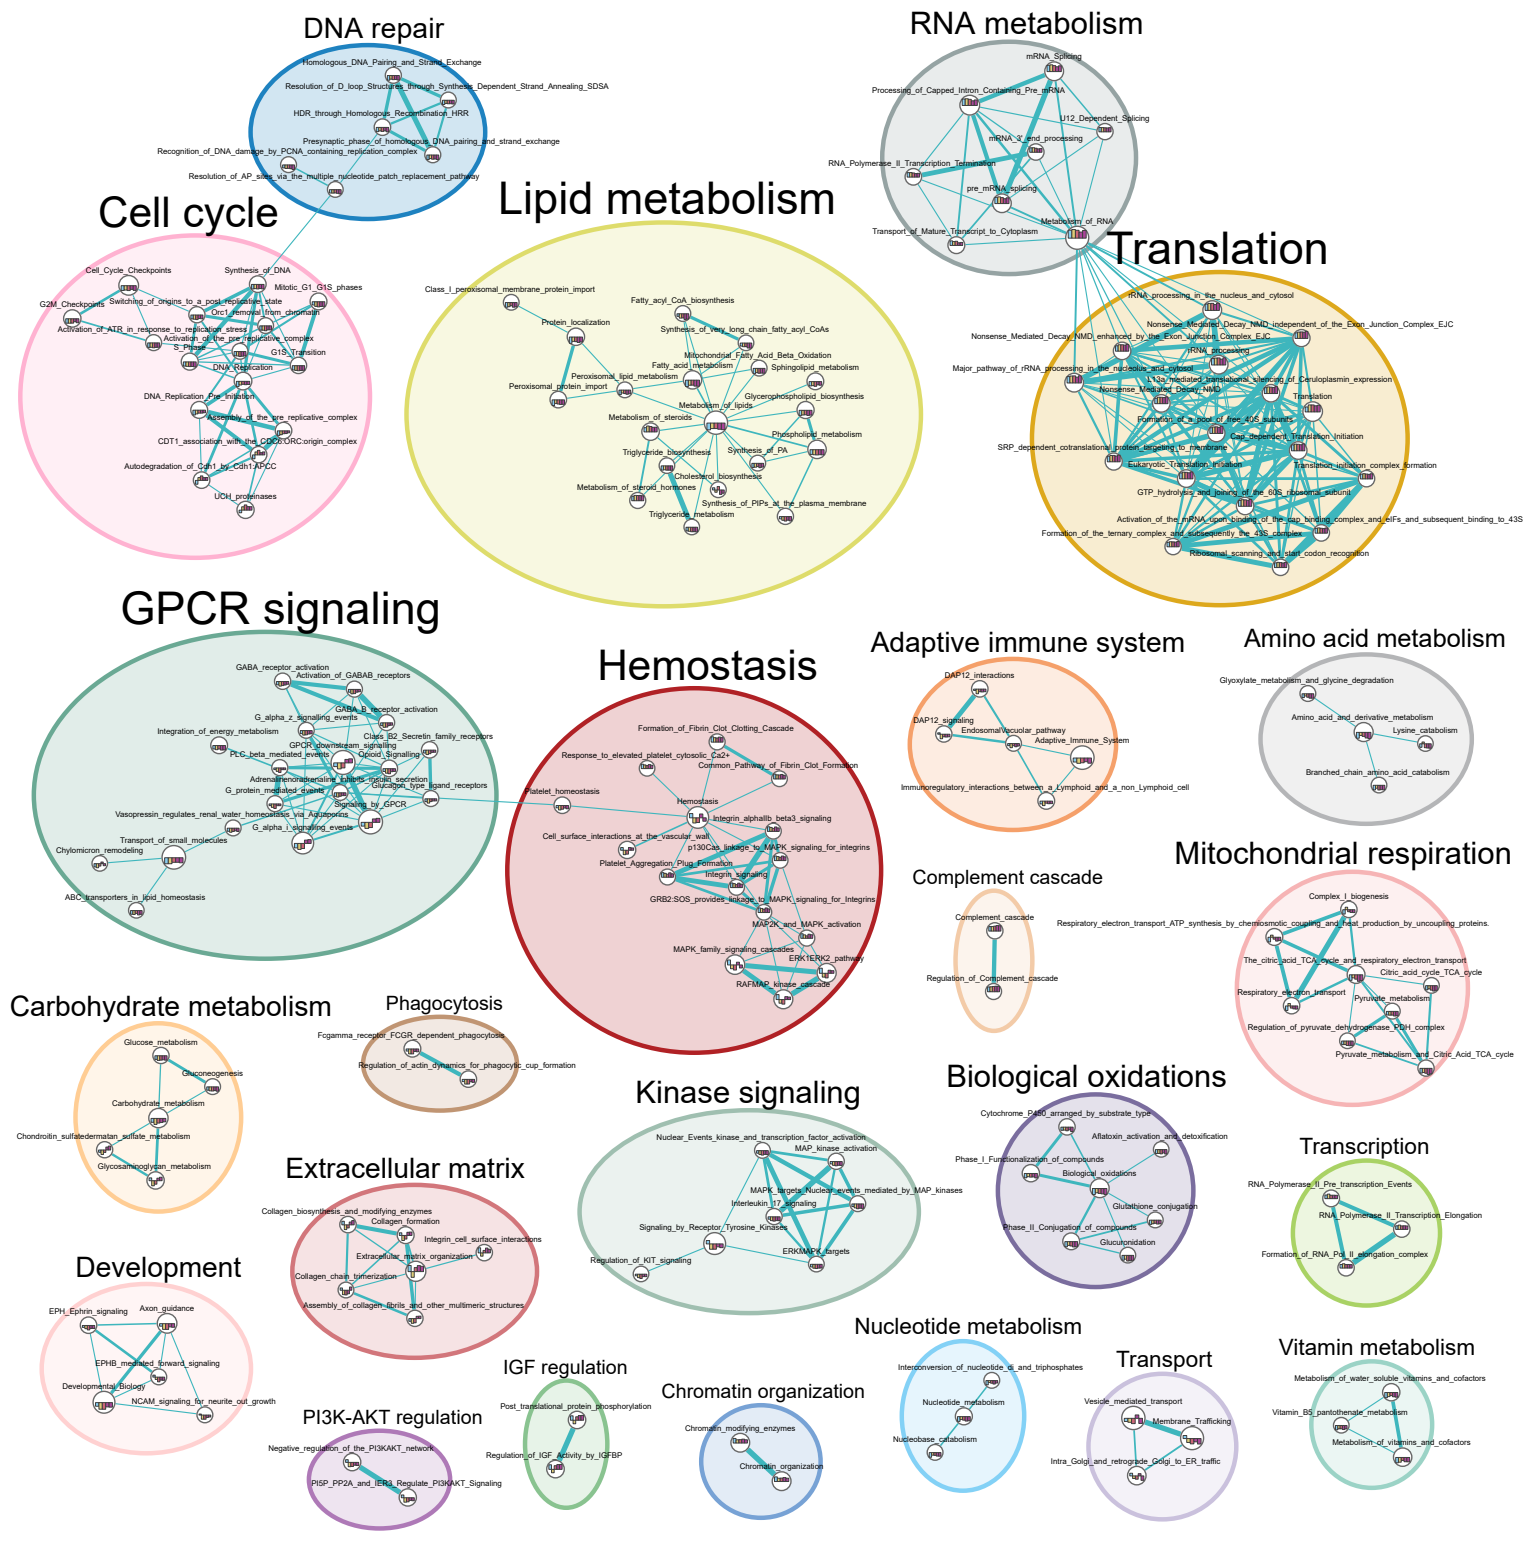

**Appendix Fig S1. Cellular pathways are perturbed by ER-agonist treatments in an isoform-specific manner.** The network displays pathway clusters (color-coded by large circles) and Reactome pathways (inner circles) identified by gene set enrichment analysis. Diameter of each inner circle indicates total number of genes per pathway (low: narrow, high: wide). Line thickness connecting Reactome pathways specifies term similarity (similarity > 0.5). Colored bars inside each inner circle display pathway enrichment of CD and ER-agonist-treated HFD relative to HFD males (normalized enrichment score, NES).

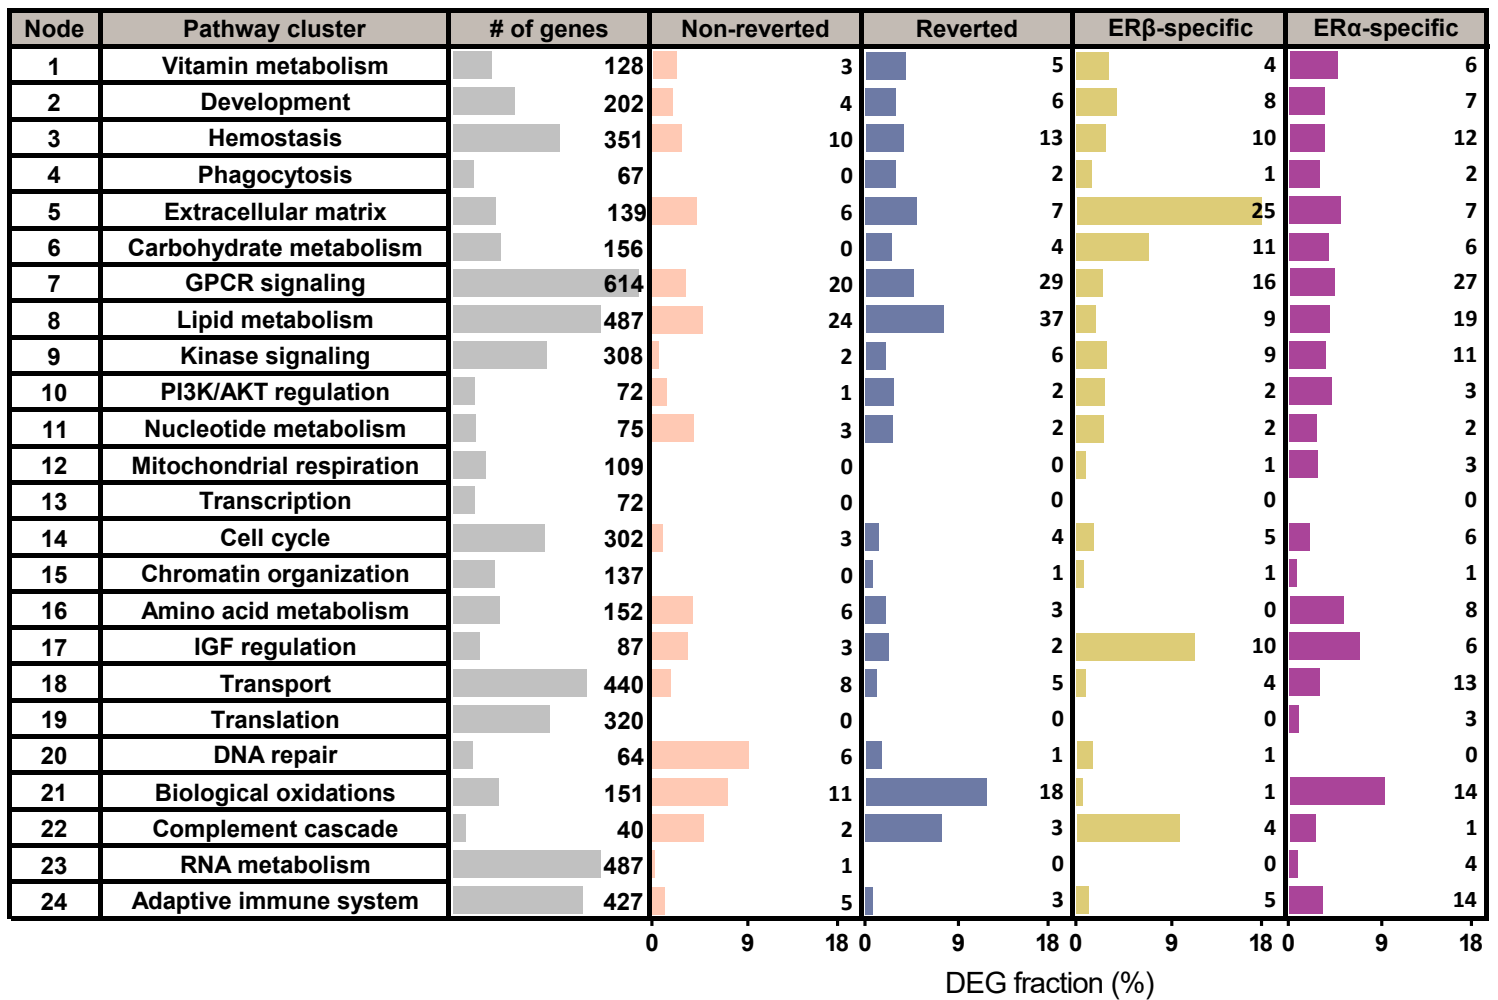

**Appendix Fig S2. ER $\beta$  activation alters a high number of genes involved in extracellular matrix organization and IGF regulation.** The table illustrates the number of expressed genes, deregulated genes for non-reverted (rose), reverted (denim), ER $\beta$ -specific (DPN-DIP, ochre) and ER $\alpha$ -specific (E2-PPT, violet) gene sets (Figure 2B) for each parent term. The bar length (x-axis) indicates the percentage of deregulated genes compared to the total number of genes per parent term.

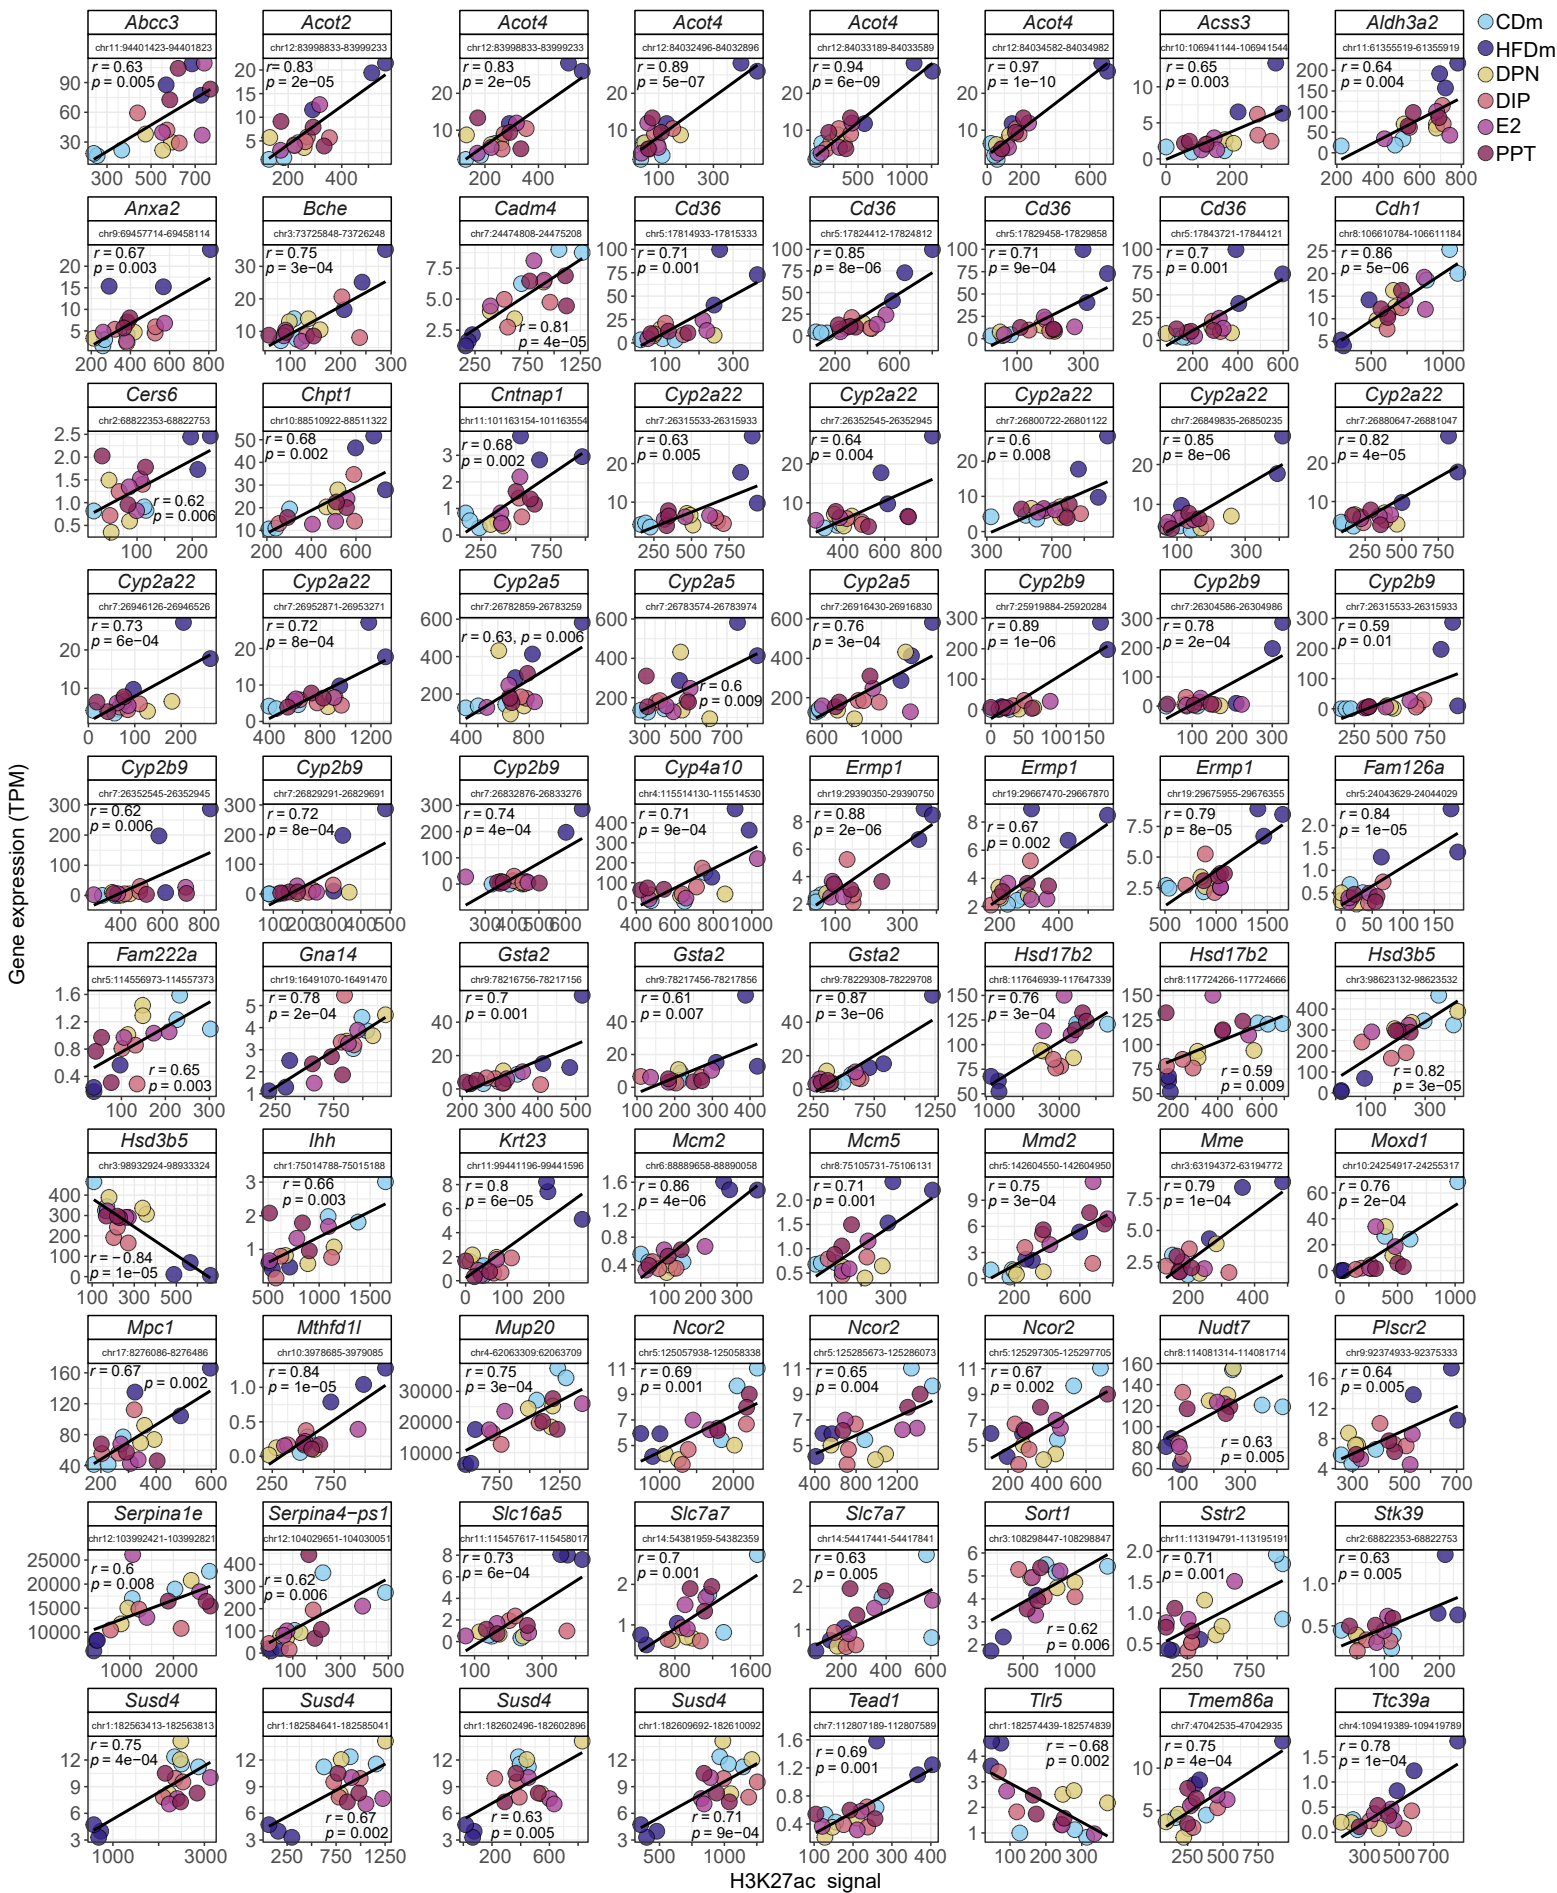

**Appendix Fig S3. H3K27 acetylation - gene expression correlations identify 80 estrogen-sensitive enhancer-gene pairs.** Scatter plots correlate expression (TPM, y-axis) of genes reverted by ER agonists and their respective paired estrogen-sensitive enhancers (H3K27ac signals, x-axis) in livers of male mice on different diets and ER-agonist treatments. All replicates are shown. Enhancer coordinates (400 bp window around the enhancer summit), Pearson correlation coefficient ( $r$ ) and p-value ( $p$ ) are indicated in each box.
